# Supplementary material for: Association of Cigarette Type Initially Smoked With Suicidal Behaviors Among Adolescents in Korea From 2015 to 2018
Source: PubMed Central journal article supplement (PMC8087956; doi:10.1001/jamanetworkopen.2021.8803), 2021-04-30
Supplement: jamanetwopen-e218803-s001.pdf [file jamanetwopen-e218803-s001.pdf]

## Supplementary Online Content

Kim SH, Jeong SH, Park EC, Jang SI. Association of cigarette type initially smoked with suicidal behaviors among adolescents in Korea from 2015 to 2018. *JAMA Netw Open*. 2021;4(4):e218803. doi:10.1001/jamanetworkopen.2021.8803

**eTable 1.** Demographic Characteristics for Secondary Analyses of the Sample, 2015 to 2018

**eTable 2.** Association Between Initial Cigarette Type and Suicidal Behaviors Stratified by Current Smoking Status

**eTable 3.** Sensitivity Analyses of the Association Between Cigarette Type Initially Smoked and Suicidal Behaviors

**eTable 4.** Sensitivity Analyses of the Association Between Switching Cigarette Type and Suicidal Behaviors

**eTable 5.** Sensitivity Analyses of the Association of the Timing of Switching Cigarette Type With Suicidal Behaviors

This supplementary material has been provided by the authors to give readers additional information about their work.

**eTable 1.** Demographic Characteristics for Secondary Analyses of the Sample, 2015 to 2018

| Characteristics                      | Participants   |                |             |                  |              |                  |            |                                                                   |            |                                                                      |            |                                                                   |            |             |
|--------------------------------------|----------------|----------------|-------------|------------------|--------------|------------------|------------|-------------------------------------------------------------------|------------|----------------------------------------------------------------------|------------|-------------------------------------------------------------------|------------|-------------|
|                                      | Total<br>N     | Never smoked   |             | Used Only c-cig. |              | Used Only e-cig. |            | Switched from<br>c-cig. to e-cig.<br>(c-cig.→e-cig.) <sup>a</sup> |            | Initiated smoking<br>using both<br>e-cig. & c-cig.<br>(in same year) |            | Switched from<br>e-cig. to c-cig.<br>(e-cig.→c-cig.) <sup>a</sup> |            | P-<br>value |
|                                      | N              | N              | %           | N                | %            | N                | %          | N                                                                 | %          | N                                                                    | %          | N                                                                 | %          |             |
| <b>Male (n=131,094)</b>              | <b>131,094</b> | <b>100,416</b> | <b>76.6</b> | <b>13,886</b>    | <b>10.59</b> | <b>2,412</b>     | <b>1.8</b> | <b>9,464</b>                                                      | <b>7.2</b> | <b>4,018</b>                                                         | <b>3.1</b> | <b>898</b>                                                        | <b>0.7</b> |             |
| <b>School grade</b>                  |                |                |             |                  |              |                  |            |                                                                   |            |                                                                      |            |                                                                   |            |             |
| 7                                    | 21,230         | 19,931         | 93.9        | 859              | 4.0          | 183              | 0.9        | 86                                                                | 0.4        | 147                                                                  | 0.7        | 24                                                                | 0.1        | <.001       |
| 8                                    | 21,913         | 18,971         | 86.6        | 1,576            | 7.2          | 282              | 1.3        | 440                                                               | 2.0        | 538                                                                  | 2.5        | 106                                                               | 0.5        |             |
| 9                                    | 22,437         | 17,808         | 79.4        | 2,224            | 9.9          | 443              | 2.0        | 998                                                               | 4.4        | 792                                                                  | 3.5        | 172                                                               | 0.8        |             |
| 10                                   | 21,520         | 15,387         | 71.5        | 2,629            | 12.2         | 497              | 2.3        | 1,901                                                             | 8.8        | 906                                                                  | 4.2        | 200                                                               | 0.9        |             |
| 11                                   | 22,241         | 14,758         | 66.4        | 3,139            | 14.1         | 530              | 2.4        | 2,721                                                             | 12.2       | 901                                                                  | 4.1        | 192                                                               | 0.9        |             |
| 12                                   | 21,753         | 13,561         | 62.3        | 3,459            | 15.9         | 477              | 2.2        | 3,318                                                             | 15.3       | 734                                                                  | 3.4        | 204                                                               | 0.9        |             |
| <b>Economic status</b>               |                |                |             |                  |              |                  |            |                                                                   |            |                                                                      |            |                                                                   |            |             |
| Low                                  | 3,928          | 2,327          | 59.2        | 618              | 15.7         | 115              | 2.9        | 581                                                               | 14.8       | 226                                                                  | 5.8        | 61                                                                | 1.6        | <.001       |
| Medium-low                           | 15,491         | 10,926         | 70.5        | 2,098            | 13.5         | 298              | 1.9        | 1,540                                                             | 9.9        | 515                                                                  | 3.3        | 114                                                               | 0.7        |             |
| Medium                               | 57,982         | 44,580         | 76.9        | 6,339            | 10.9         | 1,012            | 1.7        | 4,053                                                             | 7.0        | 1,678                                                                | 2.9        | 320                                                               | 0.6        |             |
| Medium-high                          | 37,800         | 30,103         | 79.6        | 3,437            | 9.1          | 658              | 1.7        | 2,312                                                             | 6.1        | 1,052                                                                | 2.8        | 238                                                               | 0.6        |             |
| High                                 | 15,893         | 12,480         | 78.5        | 1,394            | 8.8          | 329              | 2.1        | 978                                                               | 6.2        | 547                                                                  | 3.4        | 165                                                               | 1.0        |             |
| <b>Living situation</b>              |                |                |             |                  |              |                  |            |                                                                   |            |                                                                      |            |                                                                   |            |             |
| Without extended or immediate family | 5,962          | 4,050          | 67.9        | 827              | 13.9         | 181              | 3.0        | 518                                                               | 8.7        | 288                                                                  | 4.8        | 98                                                                | 1.6        | <.001       |
| With extended family                 | 1,131          | 674            | 59.6        | 168              | 14.9         | 54               | 4.8        | 132                                                               | 11.7       | 56                                                                   | 5.0        | 47                                                                | 4.2        |             |
| With immediate family                | 124,001        | 95,692         | 77.2        | 12,891           | 10.4         | 2,177            | 1.8        | 8,814                                                             | 7.1        | 3,674                                                                | 3.0        | 753                                                               | 0.6        |             |
| <b>Academic achievement</b>          |                |                |             |                  |              |                  |            |                                                                   |            |                                                                      |            |                                                                   |            |             |
| Low                                  | 14,292         | 8,688          | 60.8        | 2,112            | 14.8         | 350              | 2.4        | 2,173                                                             | 15.2       | 798                                                                  | 5.6        | 171                                                               | 1.2        | <.001       |

|                                    |         |        |      |        |      |       |     |       |      |       |     |     |     |       |
|------------------------------------|---------|--------|------|--------|------|-------|-----|-------|------|-------|-----|-----|-----|-------|
| Medium-low                         | 28,883  | 20,670 | 71.6 | 3,697  | 12.8 | 588   | 2.0 | 2,698 | 9.3  | 1,001 | 3.5 | 229 | 0.8 |       |
| Medium                             | 36,011  | 28,152 | 78.2 | 3,703  | 10.3 | 642   | 1.8 | 2,310 | 6.4  | 1,003 | 2.8 | 201 | 0.6 |       |
| Medium-high                        | 32,233  | 26,507 | 82.2 | 2,850  | 8.8  | 491   | 1.5 | 1,479 | 4.6  | 754   | 2.3 | 152 | 0.5 |       |
| High                               | 19,675  | 16,399 | 83.3 | 1,524  | 7.7  | 341   | 1.7 | 804   | 4.1  | 462   | 2.3 | 145 | 0.7 |       |
| <b>Alcohol use</b>                 |         |        |      |        |      |       |     |       |      |       |     |     |     |       |
| Ever                               | 57,494  | 32,742 | 56.9 | 10,213 | 17.8 | 1,624 | 2.8 | 8,794 | 15.3 | 3,361 | 5.8 | 760 | 1.3 | <.001 |
| Never                              | 73,600  | 67,674 | 91.9 | 3,673  | 5.0  | 788   | 1.1 | 670   | 0.9  | 657   | 0.9 | 138 | 0.2 |       |
| <b>Physical activity level</b>     |         |        |      |        |      |       |     |       |      |       |     |     |     |       |
| Low                                | 53,224  | 41,299 | 77.6 | 5,583  | 10.5 | 820   | 1.5 | 3,828 | 7.2  | 1,403 | 2.6 | 291 | 0.5 | <.001 |
| High                               | 77,870  | 59,117 | 75.9 | 8,303  | 10.7 | 1,592 | 2.0 | 5,636 | 7.2  | 2,615 | 3.4 | 607 | 0.8 |       |
| <b>Self-reported health status</b> |         |        |      |        |      |       |     |       |      |       |     |     |     |       |
| Low                                | 6,515   | 4,744  | 72.8 | 773    | 11.9 | 105   | 1.6 | 630   | 9.7  | 211   | 3.2 | 52  | 0.8 | <.001 |
| Medium                             | 23,570  | 17,770 | 75.4 | 2,667  | 11.3 | 423   | 1.8 | 1,836 | 7.8  | 712   | 3.0 | 162 | 0.7 |       |
| High                               | 101,009 | 77,902 | 77.1 | 10,446 | 10.3 | 1,884 | 1.9 | 6,998 | 6.9  | 3,095 | 3.1 | 684 | 0.7 |       |
| <b>Perceived stress level</b>      |         |        |      |        |      |       |     |       |      |       |     |     |     |       |
| Low                                | 33,654  | 27,154 | 80.7 | 3,051  | 9.1  | 542   | 1.6 | 1,836 | 5.5  | 862   | 2.6 | 209 | 0.6 | <.001 |
| Medium                             | 57,708  | 44,586 | 77.3 | 6,081  | 10.5 | 1,047 | 1.8 | 3,945 | 6.8  | 1,689 | 2.9 | 360 | 0.6 |       |
| High                               | 39,732  | 28,676 | 72.2 | 4,754  | 12.0 | 823   | 2.1 | 3,683 | 9.3  | 1,467 | 3.7 | 329 | 0.8 |       |
| <b>Suicidal ideation</b>           |         |        |      |        |      |       |     |       |      |       |     |     |     |       |
| Yes                                | 12,271  | 8,062  | 65.7 | 1,735  | 14.1 | 308   | 2.5 | 1,339 | 10.9 | 635   | 5.2 | 192 | 1.6 | <.001 |
| No                                 | 118,823 | 92,354 | 77.7 | 12,151 | 10.2 | 2,104 | 1.8 | 8,125 | 6.8  | 3,383 | 2.8 | 706 | 0.6 |       |
| <b>Suicide planning</b>            |         |        |      |        |      |       |     |       |      |       |     |     |     |       |
| Yes                                | 4,615   | 2,867  | 62.1 | 664    | 14.4 | 163   | 3.5 | 527   | 11.4 | 286   | 6.2 | 108 | 2.3 | <.001 |
| No                                 | 126,479 | 97,549 | 77.1 | 13,222 | 10.5 | 2,249 | 1.8 | 8,937 | 7.1  | 3,732 | 3.0 | 790 | 0.6 |       |
| <b>Suicide attempt</b>             |         |        |      |        |      |       |     |       |      |       |     |     |     |       |
| Yes                                | 2,613   | 1,489  | 57.0 | 375    | 14.4 | 103   | 3.9 | 383   | 14.7 | 188   | 7.2 | 75  | 2.9 | <.001 |

|                                      |                |                |             |              |             |            |            |              |            |            |            |            |            |       |
|--------------------------------------|----------------|----------------|-------------|--------------|-------------|------------|------------|--------------|------------|------------|------------|------------|------------|-------|
| No                                   | 128,481        | 98,927         | 77.0        | 13,511       | 10.5        | 2,309      | 1.8        | 9,081        | 7.1        | 3,830      | 3.0        | 823        | 0.6        |       |
| <b>Female (n=124,793)</b>            | <b>124,793</b> | <b>114,545</b> | <b>91.8</b> | <b>6,313</b> | <b>5.06</b> | <b>685</b> | <b>0.5</b> | <b>2,058</b> | <b>1.6</b> | <b>925</b> | <b>0.7</b> | <b>267</b> | <b>0.2</b> |       |
| <b>School grade</b>                  |                |                |             |              |             |            |            |              |            |            |            |            |            |       |
| 7                                    | 20,075         | 19,620         | 97.7        | 295          | 1.5         | 67         | 0.3        | 23           | 0.1        | 54         | 0.3        | 16         | 0.1        | <.001 |
| 8                                    | 20,515         | 19,483         | 95.0        | 651          | 3.2         | 89         | 0.4        | 117          | 0.6        | 141        | 0.7        | 34         | 0.2        |       |
| 9                                    | 21,462         | 19,850         | 92.5        | 1,018        | 4.7         | 124        | 0.6        | 253          | 1.2        | 179        | 0.8        | 38         | 0.2        |       |
| 10                                   | 20,382         | 18,428         | 90.4        | 1,187        | 5.8         | 129        | 0.6        | 391          | 1.9        | 197        | 1.0        | 50         | 0.2        |       |
| 11                                   | 20,781         | 18,319         | 88.2        | 1,485        | 7.1         | 141        | 0.7        | 585          | 2.8        | 186        | 0.9        | 65         | 0.3        |       |
| 12                                   | 21,578         | 18,845         | 87.3        | 1,677        | 7.8         | 135        | 0.6        | 689          | 3.2        | 168        | 0.8        | 64         | 0.3        |       |
| <b>Economic status</b>               |                |                |             |              |             |            |            |              |            |            |            |            |            |       |
| Low                                  | 3,233          | 2,511          | 77.7        | 371          | 11.5        | 37         | 1.1        | 186          | 5.8        | 75         | 2.3        | 53         | 1.6        | <.001 |
| Medium-low                           | 16,044         | 14,003         | 87.3        | 1,265        | 7.9         | 109        | 0.7        | 448          | 2.8        | 164        | 1.0        | 55         | 0.3        |       |
| Medium                               | 61,426         | 56,879         | 92.6        | 2,937        | 4.8         | 288        | 0.5        | 883          | 1.4        | 362        | 0.6        | 77         | 0.1        |       |
| Medium-high                          | 34,283         | 32,120         | 93.7        | 1,351        | 3.9         | 161        | 0.5        | 390          | 1.1        | 215        | 0.6        | 46         | 0.1        |       |
| High                                 | 9,807          | 9,032          | 92.1        | 389          | 4.0         | 90         | 0.9        | 151          | 1.5        | 109        | 1.1        | 36         | 0.4        |       |
| <b>Living situation</b>              |                |                |             |              |             |            |            |              |            |            |            |            |            |       |
| Without extended or immediate family | 5,074          | 4,419          | 87.1        | 331          | 6.5         | 45         | 0.9        | 133          | 2.6        | 84         | 1.7        | 62         | 1.2        | <.001 |
| With extended family                 | 848            | 622            | 73.3        | 83           | 9.8         | 34         | 4.0        | 64           | 7.5        | 19         | 2.2        | 26         | 3.1        |       |
| With immediate family                | 118,871        | 109,504        | 92.1        | 5,899        | 5.0         | 606        | 0.5        | 1,861        | 1.6        | 822        | 0.7        | 179        | 0.2        |       |
| <b>Academic achievement</b>          |                |                |             |              |             |            |            |              |            |            |            |            |            |       |
| Low                                  | 11,671         | 9,374          | 80.3        | 1,248        | 10.7        | 117        | 1.0        | 627          | 5.4        | 233        | 2.0        | 72         | 0.6        | <.001 |
| Medium-low                           | 29,254         | 26,278         | 89.8        | 1,873        | 6.4         | 186        | 0.6        | 603          | 2.1        | 254        | 0.9        | 60         | 0.2        |       |
| Medium                               | 36,903         | 34,524         | 93.6        | 1,580        | 4.3         | 147        | 0.4        | 391          | 1.1        | 200        | 0.5        | 61         | 0.2        |       |
| Medium-high                          | 32,739         | 30,981         | 94.6        | 1,173        | 3.6         | 122        | 0.4        | 293          | 0.9        | 136        | 0.4        | 34         | 0.1        |       |
| High                                 | 14,226         | 13,388         | 94.1        | 439          | 3.1         | 113        | 0.8        | 144          | 1.0        | 102        | 0.7        | 40         | 0.3        |       |
| <b>Alcohol use</b>                   |                |                |             |              |             |            |            |              |            |            |            |            |            |       |

|                                    |         |         |      |       |      |     |     |       |     |     |     |     |     |       |
|------------------------------------|---------|---------|------|-------|------|-----|-----|-------|-----|-----|-----|-----|-----|-------|
| Ever                               | 43,625  | 34,778  | 79.7 | 5,281 | 12.1 | 482 | 1.1 | 1,992 | 4.6 | 851 | 2.0 | 241 | 0.6 | <.001 |
| Never                              | 81,168  | 79,767  | 98.3 | 1,032 | 1.3  | 203 | 0.3 | 66    | 0.1 | 74  | 0.1 | 26  | 0.0 |       |
| <b>Physical activity level</b>     |         |         |      |       |      |     |     |       |     |     |     |     |     |       |
| Low                                | 84,362  | 77,567  | 91.9 | 4,335 | 5.1  | 405 | 0.5 | 1,368 | 1.6 | 562 | 0.7 | 125 | 0.1 | <.001 |
| High                               | 40,431  | 36,978  | 91.5 | 1,978 | 4.9  | 280 | 0.7 | 690   | 1.7 | 363 | 0.9 | 142 | 0.4 |       |
| <b>Self-reported health status</b> |         |         |      |       |      |     |     |       |     |     |     |     |     |       |
| Low                                | 9,306   | 8,005   | 86.0 | 768   | 8.3  | 66  | 0.7 | 322   | 3.5 | 113 | 1.2 | 32  | 0.3 | <.001 |
| Medium                             | 31,493  | 28,414  | 90.2 | 1,910 | 6.1  | 182 | 0.6 | 661   | 2.1 | 256 | 0.8 | 70  | 0.2 |       |
| High                               | 83,994  | 78,126  | 93.0 | 3,635 | 4.3  | 437 | 0.5 | 1,075 | 1.3 | 556 | 0.7 | 165 | 0.2 |       |
| <b>Perceived stress level</b>      |         |         |      |       |      |     |     |       |     |     |     |     |     |       |
| Low                                | 17,579  | 16,563  | 94.2 | 584   | 3.3  | 86  | 0.5 | 181   | 1.0 | 110 | 0.6 | 55  | 0.3 | <.001 |
| Medium                             | 51,071  | 47,878  | 93.7 | 2,061 | 4.0  | 221 | 0.4 | 540   | 1.1 | 286 | 0.6 | 85  | 0.2 |       |
| High                               | 56,143  | 50,104  | 89.2 | 3,668 | 6.5  | 378 | 0.7 | 1,337 | 2.4 | 529 | 0.9 | 127 | 0.2 |       |
| <b>Suicidal ideation</b>           |         |         |      |       |      |     |     |       |     |     |     |     |     |       |
| Yes                                | 18,996  | 16,082  | 84.7 | 1,702 | 9.0  | 178 | 0.9 | 634   | 3.3 | 299 | 1.6 | 101 | 0.5 | <.001 |
| No                                 | 105,797 | 98,463  | 93.1 | 4,611 | 4.4  | 507 | 0.5 | 1,424 | 1.3 | 626 | 0.6 | 166 | 0.2 |       |
| <b>Suicide planning</b>            |         |         |      |       |      |     |     |       |     |     |     |     |     |       |
| Yes                                | 5,720   | 4,534   | 79.3 | 624   | 10.9 | 83  | 1.5 | 274   | 4.8 | 142 | 2.5 | 63  | 1.1 | <.001 |
| No                                 | 119,073 | 110,011 | 92.4 | 5,689 | 4.8  | 602 | 0.5 | 1,784 | 1.5 | 783 | 0.7 | 204 | 0.2 |       |
| <b>Suicide attempt</b>             |         |         |      |       |      |     |     |       |     |     |     |     |     |       |
| Yes                                | 4,086   | 3,041   | 74.4 | 531   | 13.0 | 76  | 1.9 | 248   | 6.1 | 132 | 3.2 | 58  | 1.4 | <.001 |
| No                                 | 120,707 | 111,504 | 92.4 | 5,782 | 4.8  | 609 | 0.5 | 1,810 | 1.5 | 793 | 0.7 | 209 | 0.2 |       |

<sup>a</sup> Including all participants who smoked the other cigarette type after the first smoking.  
Abbreviations: e-cigarettes, electronic cigarettes; c-cigarettes, conventional cigarettes.

**eTable 2.** Association Between Initial Cigarette Type and Suicidal Behaviors Stratified by Current Smoking Status

| Variables              |                        | Suicidal ideation |        |   |         | Suicide planning   |             |       |         | Suicide attempt |                    |             |         |   |        |                    |
|------------------------|------------------------|-------------------|--------|---|---------|--------------------|-------------|-------|---------|-----------------|--------------------|-------------|---------|---|--------|--------------------|
| Current smoking status | Initial cigarette type | AOR               | 95% CI |   | P-value | AOR                | 95% CI      |       | P-value | AOR             | 95% CI             |             | P-value |   |        |                    |
| <b>Male</b>            |                        |                   |        |   |         |                    |             |       |         |                 |                    |             |         |   |        |                    |
| Dual user              | Started with e-cig.    | 3.87              | (2.75  | – | 5.43)   | <.001 <sup>a</sup> | 6.23        | (4.35 | –       | 8.91)           | <.001 <sup>a</sup> | 7.08        | (4.83   | – | 10.36) | <.001 <sup>a</sup> |
|                        | Started with c-cig.    | 1.91              | (1.71  | – | 2.13)   | <.001 <sup>a</sup> | 2.67        | (2.31 | –       | 3.07)           | <.001 <sup>a</sup> | 3.56        | (3.03   | – | 4.19)  | <.001 <sup>a</sup> |
| E-cig. user            | Started with e-cig.    | 2.68              | (2.08  | – | 3.44)   | <.001 <sup>a</sup> | 4.18        | (3.21 | –       | 5.44)           | <.001 <sup>a</sup> | 5.56        | (4.07   | – | 7.61)  | <.001 <sup>a</sup> |
|                        | Started with c-cig.    | 1.28              | (0.94  | – | 1.74)   | .11                | 1.67        | (1.09 | –       | 2.55)           | .02                | 2.15        | (1.27   | – | 3.64)  | .004               |
| C-cig. user            | Started with e-cig.    | 2.30              | (1.56  | – | 3.38)   | <.001 <sup>a</sup> | 2.63        | (1.52 | –       | 4.55)           | .001 <sup>a</sup>  | 2.87        | (1.35   | – | 6.09)  | .01                |
|                        | Started with c-cig.    | 1.41              | (1.30  | – | 1.54)   | <.001 <sup>a</sup> | 1.74        | (1.53 | –       | 1.98)           | <.001 <sup>a</sup> | 2.14        | (1.83   | – | 2.51)  | <.001 <sup>a</sup> |
| Ex-smoker              | Started with e-cig.    | 1.23              | (1.05  | – | 1.44)   | .01                | 1.57        | (1.25 | –       | 1.98)           | .001 <sup>a</sup>  | 1.52        | (1.12   | – | 2.07)  | .01                |
|                        | Started with c-cig.    | 1.24              | (1.16  | – | 1.32)   | <.001 <sup>a</sup> | 1.19        | (1.07 | –       | 1.33)           | <.001 <sup>a</sup> | 1.29        | (1.11   | – | 1.49)  | <.001 <sup>a</sup> |
| Never smoked           |                        | <b>1.00</b>       |        |   |         |                    | <b>1.00</b> |       |         |                 |                    | <b>1.00</b> |         |   |        |                    |
| <b>Female</b>          |                        |                   |        |   |         |                    |             |       |         |                 |                    |             |         |   |        |                    |
| Dual user              | Started with e-cig.    | 4.70              | (2.78  | – | 7.96)   | <.001 <sup>a</sup> | 6.85        | (4.03 | –       | 11.62)          | <.001 <sup>a</sup> | 11.04       | (6.21   | – | 19.63) | <.001 <sup>a</sup> |
|                        | Started with c-cig.    | 2.34              | (1.97  | – | 2.78)   | <.001 <sup>a</sup> | 3.67        | (2.99 | –       | 4.51)           | <.001 <sup>a</sup> | 5.15        | (4.15   | – | 6.38)  | <.001 <sup>a</sup> |
| E-cig. user            | Started with e-cig.    | 2.46              | (1.61  | – | 3.76)   | <.001 <sup>a</sup> | 5.16        | (3.24 | –       | 8.21)           | <.001 <sup>a</sup> | 5.41        | (3.21   | – | 9.13)  | <.001 <sup>a</sup> |
|                        | Started with c-cig.    | 1.99              | (1.14  | – | 3.47)   | .02                | 4.55        | (2.22 | –       | 9.34)           | <.001 <sup>a</sup> | 3.79        | (1.97   | – | 7.28)  | <.001 <sup>a</sup> |
| C-cig. user            | Started with e-cig.    | 1.45              | (0.75  | – | 2.81)   | .27                | 2.58        | (1.19 | –       | 5.62)           | .02                | 3.99        | (1.92   | – | 8.32)  | .001 <sup>a</sup>  |
|                        | Started with c-cig.    | 1.65              | (1.48  | – | 1.83)   | <.001 <sup>a</sup> | 2.17        | (1.88 | –       | 2.50)           | <.001 <sup>a</sup> | 2.85        | (2.47   | – | 3.29)  | <.001 <sup>a</sup> |
| Ex-smoker              | Started with e-cig.    | 1.36              | (1.07  | – | 1.74)   | .01                | 1.68        | (1.20 | –       | 2.37)           | .003               | 2.54        | (1.82   | – | 3.55)  | <.001 <sup>a</sup> |
|                        | Started with c-cig.    | 1.36              | (1.25  | – | 1.48)   | <.001 <sup>a</sup> | 1.44        | (1.27 | –       | 1.62)           | <.001 <sup>a</sup> | 1.81        | (1.59   | – | 2.06)  | <.001 <sup>a</sup> |
| Never smoked           |                        | <b>1.00</b>       |        |   |         |                    | <b>1.00</b> |       |         |                 |                    | <b>1.00</b> |         |   |        |                    |

Adjusted for school grade, economic status, living situation, academic achievement, alcohol use, physical activity level, self-reported health status, perceived stress level.

<sup>a</sup> Statistically significant after applying Bonferroni correction.

Abbreviations: AOR, adjusted odds ratio; e-cig., electronic cigarettes; c-cig., conventional cigarettes.

**eTable 3.** Sensitivity Analyses of the Association Between Cigarette Type Initially Smoked and Suicidal Behaviors

| Variables                                                                                                                                                 | Suicidal ideation |             |                    |             |             |                    | Suicide planning |             |                    |             |             |                    | Suicide attempt |             |                    |             |             |                    |
|-----------------------------------------------------------------------------------------------------------------------------------------------------------|-------------------|-------------|--------------------|-------------|-------------|--------------------|------------------|-------------|--------------------|-------------|-------------|--------------------|-----------------|-------------|--------------------|-------------|-------------|--------------------|
|                                                                                                                                                           | Male              |             |                    | Female      |             |                    | Male             |             |                    | Female      |             |                    | Male            |             |                    | Female      |             |                    |
|                                                                                                                                                           | AOR               | 95% CI      | P-value            | AOR         | 95% CI      | P-value            | AOR              | 95% CI      | P-value            | AOR         | 95% CI      | P-value            | AOR             | 95% CI      | P-value            | AOR         | 95% CI      | P-value            |
| <b>Sensitivity analysis (1) - excluding those who started smoking or changed the cigarette type within 12 months from the time of survey <sup>a</sup></b> |                   |             |                    |             |             |                    |                  |             |                    |             |             |                    |                 |             |                    |             |             |                    |
| <b>Never smoking as reference</b>                                                                                                                         |                   |             |                    |             |             |                    |                  |             |                    |             |             |                    |                 |             |                    |             |             |                    |
| Started with e-cigarette                                                                                                                                  | 1.71              | (1.49–1.96) | <.001 <sup>c</sup> | 1.89        | (1.54–2.32) | <.001 <sup>c</sup> | 2.68             | (2.26–3.18) | <.001 <sup>c</sup> | 3.16        | (2.48–4.02) | <.001 <sup>c</sup> | 3.07            | (2.49–3.77) | <.001 <sup>c</sup> | 4.66        | (3.63–5.99) | <.001 <sup>c</sup> |
| Started with c-cigarette                                                                                                                                  | 1.35              | (1.27–1.43) | <.001 <sup>c</sup> | 1.48        | (1.38–1.59) | <.001 <sup>c</sup> | 1.51             | (1.38–1.65) | <.001 <sup>c</sup> | 1.89        | (1.71–2.03) | <.001 <sup>c</sup> | 1.85            | (1.65–2.06) | <.001 <sup>c</sup> | 2.43        | (2.19–2.70) | <.001 <sup>c</sup> |
| Never smoked                                                                                                                                              | <b>1.00</b>       |             |                    | <b>1.00</b> |             |                    | <b>1.00</b>      |             |                    | <b>1.00</b> |             |                    | <b>1.00</b>     |             |                    | <b>1.00</b> |             |                    |
| <b>Started with c-cigarette as reference</b>                                                                                                              |                   |             |                    |             |             |                    |                  |             |                    |             |             |                    |                 |             |                    |             |             |                    |
| Started with e-cigarette                                                                                                                                  | 1.27              | (1.11–1.46) | <.001 <sup>c</sup> | 1.28        | (1.03–1.58) | .03                | 1.78             | (1.49–2.12) | <.001 <sup>c</sup> | 1.67        | (1.30–2.15) | <.001 <sup>c</sup> | 1.66            | (1.35–2.05) | <.001 <sup>c</sup> | 1.92        | (1.48–2.50) | <.001 <sup>c</sup> |
| Never smoked                                                                                                                                              | 0.74              | (0.70–0.79) | <.001 <sup>c</sup> | 0.68        | (0.63–0.72) | <.001 <sup>c</sup> | 0.66             | (0.61–0.72) | <.001 <sup>c</sup> | 0.53        | (0.48–0.58) | <.001 <sup>c</sup> | 0.54            | (0.48–0.61) | <.001 <sup>c</sup> | 0.41        | (0.37–0.45) | <.001 <sup>c</sup> |
| Started with c-cigarette                                                                                                                                  | <b>1.00</b>       |             |                    | <b>1.00</b> |             |                    | <b>1.00</b>      |             |                    | <b>1.00</b> |             |                    | <b>1.00</b>     |             |                    | <b>1.00</b> |             |                    |
| <b>Sensitivity analysis (2) - age as a covariate <sup>b</sup></b>                                                                                         |                   |             |                    |             |             |                    |                  |             |                    |             |             |                    |                 |             |                    |             |             |                    |
| <b>Never smoking as reference</b>                                                                                                                         |                   |             |                    |             |             |                    |                  |             |                    |             |             |                    |                 |             |                    |             |             |                    |
| Started with e-cigarette                                                                                                                                  | 1.69              | (1.49–1.92) | <.001 <sup>c</sup> | 1.66        | (1.36–2.02) | <.001 <sup>c</sup> | 2.39             | (2.04–2.80) | <.001 <sup>c</sup> | 2.37        | (1.83–3.06) | <.001 <sup>c</sup> | 2.69            | (2.20–3.30) | <.001 <sup>c</sup> | 3.60        | (2.79–4.65) | <.001 <sup>c</sup> |
| Started with c-cigarette                                                                                                                                  | 1.35              | (1.27–1.42) | <.001 <sup>c</sup> | 1.51        | (1.41–1.61) | <.001 <sup>c</sup> | 1.47             | (1.35–1.61) | <.001 <sup>c</sup> | 1.79        | (1.63–1.97) | <.001 <sup>c</sup> | 1.76            | (1.58–1.97) | <.001 <sup>c</sup> | 2.30        | (2.08–2.54) | <.001 <sup>c</sup> |
| Never smoked                                                                                                                                              | <b>1.00</b>       |             |                    | <b>1.00</b> |             |                    | <b>1.00</b>      |             |                    | <b>1.00</b> |             |                    | <b>1.00</b>     |             |                    | <b>1.00</b> |             |                    |
| <b>Started with c-cigarette as reference</b>                                                                                                              |                   |             |                    |             |             |                    |                  |             |                    |             |             |                    |                 |             |                    |             |             |                    |
| Started with e-cigarette                                                                                                                                  | 1.26              | (1.11–1.43) | <.001 <sup>c</sup> | 1.10        | (0.90–1.35) | .36                | 1.63             | (1.38–1.91) | <.001 <sup>c</sup> | 1.32        | (1.02–1.72) | .03                | 1.53            | (1.25–1.87) | <.001 <sup>c</sup> | 1.57        | (1.20–2.05) | <.001 <sup>c</sup> |
| Never smoked                                                                                                                                              | 0.74              | (0.70–0.79) | <.001 <sup>c</sup> | 0.66        | (0.62–0.71) | <.001 <sup>c</sup> | 0.68             | (0.62–0.74) | <.001 <sup>c</sup> | 0.56        | (0.51–0.61) | <.001 <sup>c</sup> | 0.57            | (0.51–0.64) | <.001 <sup>c</sup> | 0.44        | (0.39–0.48) | <.001 <sup>c</sup> |
| Started with c-cigarette                                                                                                                                  | <b>1.00</b>       |             |                    | <b>1.00</b> |             |                    | <b>1.00</b>      |             |                    | <b>1.00</b> |             |                    | <b>1.00</b>     |             |                    | <b>1.00</b> |             |                    |

<sup>a</sup> Included sample: total, 249,395; male, 126,412; female, 122,983.



|                                                                                                                                                                                                                  |
|------------------------------------------------------------------------------------------------------------------------------------------------------------------------------------------------------------------|
| <sup>b</sup> Included sample: total, 254,478; male, 130,184; female, 124,294.                                                                                                                                    |
| <sup>c</sup> Statistically significant after applying Bonferroni correction.                                                                                                                                     |
| Adjusted for school grade <sup>a</sup> or age <sup>b</sup> , economic status, living situation, academic achievement, alcohol use, physical activity level, self-reported health status, perceived stress level. |
| Abbreviations: AOR, adjusted odds ratio; e-cigarette, electronic cigarettes; c-cigarette, conventional cigarettes.                                                                                               |

**eTable 4.** Sensitivity Analyses of the Association Between Switching Cigarette Type and Suicidal Behaviors

| Variables                                                                                                                                                 | Suicidal ideation |        |             |                    |             |             | Suicide planning |                    |             |         |        |                    | Suicide attempt |        |             |                    |             |             |      |                    |             |        |       |                    |
|-----------------------------------------------------------------------------------------------------------------------------------------------------------|-------------------|--------|-------------|--------------------|-------------|-------------|------------------|--------------------|-------------|---------|--------|--------------------|-----------------|--------|-------------|--------------------|-------------|-------------|------|--------------------|-------------|--------|-------|--------------------|
|                                                                                                                                                           | Male              |        |             | Female             |             |             | Male             |                    |             | Female  |        |                    | Male            |        |             | Female             |             |             |      |                    |             |        |       |                    |
|                                                                                                                                                           | AO<br>R           | 95% CI | P-<br>value | AO<br>R            | 95% CI      | P-<br>value | AO<br>R          | 95% CI             | P-<br>value | AO<br>R | 95% CI | P-<br>value        | AO<br>R         | 95% CI | P-<br>value | AO<br>R            | 95% CI      | P-<br>value |      |                    |             |        |       |                    |
| <b>Sensitivity analysis (1) - excluding those who started smoking or changed the cigarette type within 12 months from the time of survey <sup>a</sup></b> |                   |        |             |                    |             |             |                  |                    |             |         |        |                    |                 |        |             |                    |             |             |      |                    |             |        |       |                    |
| <b>Never smoking as reference</b>                                                                                                                         |                   |        |             |                    |             |             |                  |                    |             |         |        |                    |                 |        |             |                    |             |             |      |                    |             |        |       |                    |
| Switched from e-cig. to c-cig. (e-cig. → c-cig. or both)                                                                                                  | 2.49              | (1.94) | 3.19        | <.001 <sup>c</sup> | 2.96        | (1.90)      | 4.61             | <.001 <sup>c</sup> | 3.94        | (2.94)  | 5.29   | <.001 <sup>c</sup> | 4.80            | (3.10) | 7.44        | <.001 <sup>c</sup> | 4.39        | (3.16)      | 6.10 | <.001 <sup>c</sup> | 7.92        | (5.00) | 12.54 | <.001 <sup>c</sup> |
| Initiated smoking using both e-cig. & c-cig. (in same year)                                                                                               | 1.59              | (1.42) | 1.78        | <.001 <sup>c</sup> | 1.90        | (1.57)      | 2.29             | <.001 <sup>c</sup> | 1.96        | (1.68)  | 2.29   | <.001 <sup>c</sup> | 2.86            | (2.26) | 3.63        | <.001 <sup>c</sup> | 2.48        | (2.06)      | 2.98 | <.001 <sup>c</sup> | 3.86        | (3.00) | 4.97  | <.001 <sup>c</sup> |
| Switched from c-cig. to e-cig. (c-cig. → e-cig. or both)                                                                                                  | 1.34              | (1.22) | 1.47        | <.001 <sup>c</sup> | 1.45        | (1.26)      | 1.67             | <.001 <sup>c</sup> | 1.49        | (1.31)  | 1.71   | <.001 <sup>c</sup> | 2.11            | (1.76) | 2.53        | <.001 <sup>c</sup> | 2.11        | (1.80)      | 2.48 | <.001 <sup>c</sup> | 2.95        | (2.44) | 3.57  | <.001 <sup>c</sup> |
| Used only e-cig.                                                                                                                                          | 1.47              | (1.26) | 1.72        | <.001 <sup>c</sup> | 1.59        | (1.24)      | 2.04             | <.001 <sup>c</sup> | 2.24        | (1.83)  | 2.75   | <.001 <sup>c</sup> | 2.62            | (1.96) | 3.50        | <.001 <sup>c</sup> | 2.61        | (2.02)      | 3.36 | <.001 <sup>c</sup> | 3.66        | (2.69) | 4.98  | <.001 <sup>c</sup> |
| Used only c-cig.                                                                                                                                          | 1.29              | (1.20) | 1.38        | <.001 <sup>c</sup> | 1.44        | (1.32)      | 1.56             | <.001 <sup>c</sup> | 1.40        | (1.25)  | 1.57   | <.001 <sup>c</sup> | 1.69            | (1.53) | 1.91        | <.001 <sup>c</sup> | 1.52        | (1.31)      | 1.76 | <.001 <sup>c</sup> | 2.08        | (1.83) | 2.37  | <.001 <sup>c</sup> |
| Never smoked                                                                                                                                              | <b>1.00</b>       |        |             |                    | <b>1.00</b> |             |                  |                    | <b>1.00</b> |         |        |                    | <b>1.00</b>     |        |             |                    | <b>1.00</b> |             |      |                    | <b>1.00</b> |        |       |                    |
| <b>Switching from c-cig. to e-cig. as reference</b>                                                                                                       |                   |        |             |                    |             |             |                  |                    |             |         |        |                    |                 |        |             |                    |             |             |      |                    |             |        |       |                    |
| Switched from e-cig. to c-cig. (e-cig. → c-cig. or both)                                                                                                  | 1.86              | (1.44) | 2.41        | <.001 <sup>c</sup> | 2.04        | (1.30)      | 3.23             | .002 <sup>c</sup>  | 2.64        | (1.95)  | 3.57   | <.001 <sup>c</sup> | 2.27            | (1.43) | 3.62        | <.001 <sup>c</sup> | 2.08        | (1.47)      | 2.94 | <.001 <sup>c</sup> | 2.68        | (1.64) | 4.40  | <.001 <sup>c</sup> |
| Initiated smoking using both e-cig. & c-cig. (in same year)                                                                                               | 1.19              | (1.04) | 1.36        | .01                | 1.31        | (1.03)      | 1.66             | .03                | 1.31        | (1.09)  | 1.57   | <.001              | 1.36            | (1.01) | 1.82        | .04                | 1.17        | (0.95)      | 1.45 | .14                | 1.31        | (0.96) | 1.77  | .09                |
| Switched from c-cig. to e-cig. (c-cig. → e-cig. or both)                                                                                                  | <b>1.00</b>       |        |             |                    | <b>1.00</b> |             |                  |                    | <b>1.00</b> |         |        |                    | <b>1.00</b>     |        |             |                    | <b>1.00</b> |             |      |                    | <b>1.00</b> |        |       |                    |
| <b>Sensitivity analysis (2) - age as a covariate <sup>b</sup></b>                                                                                         |                   |        |             |                    |             |             |                  |                    |             |         |        |                    |                 |        |             |                    |             |             |      |                    |             |        |       |                    |
| <b>Never smoking as reference</b>                                                                                                                         |                   |        |             |                    |             |             |                  |                    |             |         |        |                    |                 |        |             |                    |             |             |      |                    |             |        |       |                    |

|                                                                                                                                                                                                                  |             |        |      |                    |             |        |      |                    |             |        |      |                    |             |        |      |                    |             |        |      |                    |             |        |       |                    |
|------------------------------------------------------------------------------------------------------------------------------------------------------------------------------------------------------------------|-------------|--------|------|--------------------|-------------|--------|------|--------------------|-------------|--------|------|--------------------|-------------|--------|------|--------------------|-------------|--------|------|--------------------|-------------|--------|-------|--------------------|
| Switched from e-cig. to c-cig. (e-cig. → c-cig. or both)                                                                                                                                                         | 2.55        | (2.05) | 3.18 | <.001 <sup>c</sup> | 2.52        | (1.64) | 3.86 | <.001 <sup>c</sup> | 3.39        | (2.60) | 4.43 | <.001 <sup>c</sup> | 3.60        | (2.25) | 5.75 | <.001 <sup>c</sup> | 3.94        | (2.89) | 5.37 | <.001 <sup>c</sup> | 6.75        | (4.25) | 10.73 | <.001 <sup>c</sup> |
| Initiated smoking using both e-cig. & c-cig. (in same year)                                                                                                                                                      | 1.53        | (1.37) | 1.70 | <.001 <sup>c</sup> | 1.82        | (1.53) | 2.16 | <.001 <sup>c</sup> | 1.71        | (1.47) | 2.00 | <.001 <sup>c</sup> | 2.47        | (1.96) | 3.12 | <.001 <sup>c</sup> | 2.09        | (1.72) | 2.53 | <.001 <sup>c</sup> | 3.07        | (2.40) | 3.93  | <.001 <sup>c</sup> |
| Switched from c-cig. to e-cig. (c-cig. → e-cig. or both)                                                                                                                                                         | 1.33        | (1.21) | 1.45 | <.001 <sup>c</sup> | 1.44        | (1.27) | 1.63 | <.001 <sup>c</sup> | 1.82        | (1.30) | 1.68 | <.001 <sup>c</sup> | 1.85        | (1.56) | 2.19 | <.001 <sup>c</sup> | 2.02        | (1.73) | 2.37 | <.001 <sup>c</sup> | 2.61        | (2.18) | 3.11  | <.001 <sup>c</sup> |
| Used only e-cig.                                                                                                                                                                                                 | 1.40        | (1.21) | 1.63 | <.001 <sup>c</sup> | 1.44        | (1.15) | 1.81 | .002 <sup>c</sup>  | 2.01        | (1.65) | 2.44 | <.001 <sup>c</sup> | 1.98        | (1.45) | 2.69 | <.001 <sup>c</sup> | 2.22        | (1.72) | 2.87 | <.001 <sup>c</sup> | 2.69        | (1.94) | 3.73  | <.001 <sup>c</sup> |
| Used only c-cig.                                                                                                                                                                                                 | 1.31        | (1.23) | 1.41 | <.001 <sup>c</sup> | 1.49        | (1.38) | 1.61 | <.001 <sup>c</sup> | 1.40        | (1.26) | 1.57 | <.001 <sup>c</sup> | 1.68        | (1.50) | 1.87 | <.001 <sup>c</sup> | 1.52        | (1.32) | 1.76 | <.001 <sup>c</sup> | 2.09        | (1.85) | 2.35  | <.001 <sup>c</sup> |
| Never smoked                                                                                                                                                                                                     | <b>1.00</b> |        |      |                    | <b>1.00</b> |        |      |                    | <b>1.00</b> |        |      |                    | <b>1.00</b> |        |      |                    | <b>1.00</b> |        |      |                    | <b>1.00</b> |        |       |                    |
| <b>Switching from c-cig. to e-cig. as reference</b>                                                                                                                                                              |             |        |      |                    |             |        |      |                    |             |        |      |                    |             |        |      |                    |             |        |      |                    |             |        |       |                    |
| Switched from e-cig. to c-cig. (e-cig. → c-cig. or both)                                                                                                                                                         | 1.92        | (1.53) | 2.42 | <.001 <sup>c</sup> | 1.75        | (1.13) | 2.71 | .008               | 2.29        | (1.74) | 3.02 | <.001 <sup>c</sup> | 1.94        | (1.19) | 3.19 | .003               | 1.95        | (1.41) | 2.70 | <.001 <sup>c</sup> | 2.59        | (1.59) | 4.24  | <.001 <sup>c</sup> |
| Initiated smoking using both e-cig. & c-cig. (in same year)                                                                                                                                                      | 1.15        | (1.02) | 1.31 | .03                | 1.26        | (1.02) | 1.56 | .03                | 1.16        | (0.97) | 1.37 | .09                | 1.34        | (1.01) | 1.77 | .04                | 1.03        | (0.83) | 1.29 | .71                | 1.18        | (0.88) | 1.57  | .24                |
| Switched from c-cig. to e-cig. (c-cig. → e-cig. or both)                                                                                                                                                         | <b>1.00</b> |        |      |                    | <b>1.00</b> |        |      |                    | <b>1.00</b> |        |      |                    | <b>1.00</b> |        |      |                    | <b>1.00</b> |        |      |                    | <b>1.00</b> |        |       |                    |
| <sup>a</sup> Included sample: total, 249,395; male, 126,412; female, 122,983.                                                                                                                                    |             |        |      |                    |             |        |      |                    |             |        |      |                    |             |        |      |                    |             |        |      |                    |             |        |       |                    |
| <sup>b</sup> Included sample: total, 254,478; male, 130,184; female, 124,294.                                                                                                                                    |             |        |      |                    |             |        |      |                    |             |        |      |                    |             |        |      |                    |             |        |      |                    |             |        |       |                    |
| <sup>c</sup> Statistically significant after applying Bonferroni correction.                                                                                                                                     |             |        |      |                    |             |        |      |                    |             |        |      |                    |             |        |      |                    |             |        |      |                    |             |        |       |                    |
| Adjusted for school grade <sup>a</sup> or age <sup>b</sup> , economic status, living situation, academic achievement, alcohol use, physical activity level, self-reported health status, perceived stress level. |             |        |      |                    |             |        |      |                    |             |        |      |                    |             |        |      |                    |             |        |      |                    |             |        |       |                    |
| Abbreviations: AOR, adjusted odds ratio; e-cig., electronic cigarettes; c-cig., conventional cigarettes.                                                                                                         |             |        |      |                    |             |        |      |                    |             |        |      |                    |             |        |      |                    |             |        |      |                    |             |        |       |                    |

**eTable 5.** Sensitivity Analyses of the Association of the Timing of Switching Cigarette Type With Suicidal Behaviors

| Variables                                                                                                                                                | Suicidal ideation |               |                    |                     |               |                    |                   |               |                    | Suicide planning    |                |                    |  |  |  |  |  |  |
|----------------------------------------------------------------------------------------------------------------------------------------------------------|-------------------|---------------|--------------------|---------------------|---------------|--------------------|-------------------|---------------|--------------------|---------------------|----------------|--------------------|--|--|--|--|--|--|
|                                                                                                                                                          | Male participants |               |                    | Female participants |               |                    | Male participants |               |                    | Female participants |                |                    |  |  |  |  |  |  |
|                                                                                                                                                          | AOR               | 95% CI        | P-value            | AOR                 | 95% CI        | P-value            | AOR               | 95% CI        | P-value            | AOR                 | 95% CI         | P-value            |  |  |  |  |  |  |
| <b>Sensitivity analysis (1) - excluding those who started smoking or changed the cigarette type within 12 months from the time of survey<sup>a</sup></b> |                   |               |                    |                     |               |                    |                   |               |                    |                     |                |                    |  |  |  |  |  |  |
| <b>Timing of the switching cigarette type</b>                                                                                                            |                   |               |                    |                     |               |                    |                   |               |                    |                     |                |                    |  |  |  |  |  |  |
| Started with e-cig. & switched after 2 years                                                                                                             | 3.93              | (2.57 – 5.99) | <.001 <sup>c</sup> | 4.08                | (1.99 – 8.39) | <.001 <sup>c</sup> | 5.53              | (3.48 – 8.76) | <.001 <sup>c</sup> | 8.55                | (4.48 – 16.32) | <.001 <sup>c</sup> |  |  |  |  |  |  |
| Started with e-cig. & switched in 2 years                                                                                                                | 2.00              | (1.48 – 2.70) | <.001 <sup>c</sup> | 2.43                | (1.42 – 4.18) | .002 <sup>c</sup>  | 3.29              | (2.27 – 4.75) | <.001 <sup>c</sup> | 3.09                | (1.67 – 5.70)  | <.001 <sup>c</sup> |  |  |  |  |  |  |
| Started with c-cig. & switched after 2 years                                                                                                             | 1.30              | (1.14 – 1.49) | <.001 <sup>c</sup> | 1.40                | (1.10 – 1.77) | .005               | 1.52              | (1.25 – 1.84) | <.001 <sup>c</sup> | 1.98                | (1.46 – 2.68)  | <.001 <sup>c</sup> |  |  |  |  |  |  |
| Started with c-cig. & switched in 2 years                                                                                                                | 1.36              | (1.22 – 1.52) | <.001 <sup>c</sup> | 1.48                | (1.24 – 1.76) | <.001 <sup>c</sup> | 1.49              | (1.26 – 1.75) | <.001 <sup>c</sup> | 2.20                | (1.76 – 2.74)  | <.001 <sup>c</sup> |  |  |  |  |  |  |
| Started with both e-cig. & c-cig. in same time (e-cig. = c-cig.)                                                                                         | 1.59              | (1.42 – 1.78) | <.001 <sup>c</sup> | 1.90                | (1.57 – 2.29) | <.001 <sup>c</sup> | 1.96              | (1.68 – 2.29) | <.001 <sup>c</sup> | 2.87                | (2.26 – 3.64)  | <.001 <sup>c</sup> |  |  |  |  |  |  |
| Used only one cigarette type                                                                                                                             | 1.31              | (1.23 – 1.40) | <.001 <sup>c</sup> | 1.45                | (1.34 – 1.57) | <.001 <sup>c</sup> | 1.52              | (1.37 – 1.68) | <.001 <sup>c</sup> | 1.77                | (1.58 – 1.98)  | <.001 <sup>c</sup> |  |  |  |  |  |  |
| Never smoked                                                                                                                                             | <b>1.00</b>       |               |                    | <b>1.00</b>         |               |                    | <b>1.00</b>       |               |                    | <b>1.00</b>         |                |                    |  |  |  |  |  |  |
| <b>Sensitivity analysis (2) - age as a covariate<sup>b</sup></b>                                                                                         |                   |               |                    |                     |               |                    |                   |               |                    |                     |                |                    |  |  |  |  |  |  |
| <b>Timing of the switching cigarette type</b>                                                                                                            |                   |               |                    |                     |               |                    |                   |               |                    |                     |                |                    |  |  |  |  |  |  |
| Started with e-cig. & switched after 2 years                                                                                                             | 4.32              | (2.86 – 6.51) | <.001 <sup>c</sup> | 3.03                | (1.36 – 6.77) | .006               | 5.98              | (3.87 – 9.25) | <.001 <sup>c</sup> | 6.09                | (2.85 – 13.01) | <.001 <sup>c</sup> |  |  |  |  |  |  |
| Started with e-cig. & switched in 2 years                                                                                                                | 2.07              | (1.60 – 2.68) | <.001 <sup>c</sup> | 2.32                | (1.43 – 3.76) | .001 <sup>c</sup>  | 2.56              | (1.83 – 3.58) | <.001 <sup>c</sup> | 2.70                | (1.46 – 4.98)  | .002 <sup>c</sup>  |  |  |  |  |  |  |
| Started with c-cig. & switched after 2 years                                                                                                             | 1.29              | (1.13 – 1.46) | .002 <sup>c</sup>  | 1.33                | (1.08 – 1.63) | .02                | 1.51              | (1.27 – 1.80) | <.001 <sup>c</sup> | 1.75                | (1.34 – 2.28)  | <.001 <sup>c</sup> |  |  |  |  |  |  |
| Started with c-cig. & switched in 2 years                                                                                                                | 1.35              | (1.23 – 1.49) | <.001 <sup>c</sup> | 1.52                | (1.31 – 1.76) | <.001 <sup>c</sup> | 1.47              | (1.26 – 1.71) | <.001 <sup>c</sup> | 1.92                | (1.56 – 2.37)  | <.001 <sup>c</sup> |  |  |  |  |  |  |
| Started with both e-cig. & c-cig. in same time (e-cig. = c-cig.)                                                                                         | 1.53              | (1.37 – 1.70) | <.001 <sup>c</sup> | 1.82                | (1.53 – 2.16) | <.001 <sup>c</sup> | 1.71              | (1.47 – 2.00) | <.001 <sup>c</sup> | 2.47                | (1.96 – 3.12)  | <.001 <sup>c</sup> |  |  |  |  |  |  |
| Used only one cigarette type                                                                                                                             | 1.33              | (1.24 – 1.41) | <.001 <sup>c</sup> | 1.49                | (1.38 – 1.60) | <.001 <sup>c</sup> | 1.49              | (1.35 – 1.65) | <.001 <sup>c</sup> | 1.70                | (1.53 – 1.89)  | <.001 <sup>c</sup> |  |  |  |  |  |  |

|                                                                                                                                                                                                                  |             |  |  |  |  |             |  |  |  |  |             |  |  |  |  |             |  |  |  |  |  |
|------------------------------------------------------------------------------------------------------------------------------------------------------------------------------------------------------------------|-------------|--|--|--|--|-------------|--|--|--|--|-------------|--|--|--|--|-------------|--|--|--|--|--|
| Never smoked                                                                                                                                                                                                     | <b>1.00</b> |  |  |  |  | <b>1.00</b> |  |  |  |  | <b>1.00</b> |  |  |  |  | <b>1.00</b> |  |  |  |  |  |
| <sup>a</sup> Included sample: total, 249,395; male, 126,412; female, 122,983.                                                                                                                                    |             |  |  |  |  |             |  |  |  |  |             |  |  |  |  |             |  |  |  |  |  |
| <sup>b</sup> Included sample: total, 254,478; male, 130,184; female, 124,294.                                                                                                                                    |             |  |  |  |  |             |  |  |  |  |             |  |  |  |  |             |  |  |  |  |  |
| <sup>c</sup> Statistically significant after applying Bonferroni correction.                                                                                                                                     |             |  |  |  |  |             |  |  |  |  |             |  |  |  |  |             |  |  |  |  |  |
| Adjusted for school grade <sup>a</sup> or age <sup>b</sup> , economic status, living situation, academic achievement, alcohol use, physical activity level, self-reported health status, perceived stress level. |             |  |  |  |  |             |  |  |  |  |             |  |  |  |  |             |  |  |  |  |  |
| Abbreviations: AOR, adjusted odds ratio; e-cig., electronic cigarettes; c-cig., conventional cigarettes.                                                                                                         |             |  |  |  |  |             |  |  |  |  |             |  |  |  |  |             |  |  |  |  |  |
